# Supplementary material for: Microplastic contamination of drinking water: A systematic review
Source: PubMed Central journal article supplement (PMC7394398; doi:10.1371/journal.pone.0236838), 2020-07-31
Supplement: pone.0236838.s004.pdf [file pone.0236838.s004.pdf]

**S1 Table.** Search strategy for MEDLINE (OVID) with MeSH for all available food categories.

|    |                                                                                                                                                                                                                                                                                                        |
|----|--------------------------------------------------------------------------------------------------------------------------------------------------------------------------------------------------------------------------------------------------------------------------------------------------------|
| 1  | microplastic*                                                                                                                                                                                                                                                                                          |
| 2  | micro-plastic*                                                                                                                                                                                                                                                                                         |
| 3  | nanoplastic*                                                                                                                                                                                                                                                                                           |
| 4  | nano-plastic*                                                                                                                                                                                                                                                                                          |
| 5  | plastic/                                                                                                                                                                                                                                                                                               |
| 6  | micro                                                                                                                                                                                                                                                                                                  |
| 7  | fiber*                                                                                                                                                                                                                                                                                                 |
| 8  | fibre                                                                                                                                                                                                                                                                                                  |
| 9  | microfiber*                                                                                                                                                                                                                                                                                            |
| 10 | microfibre*                                                                                                                                                                                                                                                                                            |
| 11 | micro-fiber*                                                                                                                                                                                                                                                                                           |
| 12 | micro-fibre*                                                                                                                                                                                                                                                                                           |
| 13 | particle*                                                                                                                                                                                                                                                                                              |
| 14 | particle size/                                                                                                                                                                                                                                                                                         |
| 15 | pellet*                                                                                                                                                                                                                                                                                                |
| 16 | fragment*                                                                                                                                                                                                                                                                                              |
| 17 | film*                                                                                                                                                                                                                                                                                                  |
| 18 | filament*                                                                                                                                                                                                                                                                                              |
| 19 | rubber/                                                                                                                                                                                                                                                                                                |
| 20 | 5 and 6                                                                                                                                                                                                                                                                                                |
| 21 | 5 and 7                                                                                                                                                                                                                                                                                                |
| 22 | 5 and 8                                                                                                                                                                                                                                                                                                |
| 23 | 5 and 9                                                                                                                                                                                                                                                                                                |
| 24 | 5 and 10                                                                                                                                                                                                                                                                                               |
| 25 | 5 and 11                                                                                                                                                                                                                                                                                               |
| 26 | 5 and 12                                                                                                                                                                                                                                                                                               |
| 27 | 5 and 13                                                                                                                                                                                                                                                                                               |
| 28 | 5 and 14                                                                                                                                                                                                                                                                                               |
| 29 | 5 and 15                                                                                                                                                                                                                                                                                               |
| 30 | 5 and 16                                                                                                                                                                                                                                                                                               |
| 31 | 5 and 17                                                                                                                                                                                                                                                                                               |
| 32 | 5 and 18                                                                                                                                                                                                                                                                                               |
| 33 | 5 and 19                                                                                                                                                                                                                                                                                               |
| 34 | 1 or 2 or 3 or 4 or 20 or 21 or 22 or 23 or 24 or 25 or 26 or 27 or 28 or 29 or 30 or 31 or 32 or 33                                                                                                                                                                                                   |
| 35 | food quality/ or food dye/ or food ingredient/ or canned food/ or food packaging/ or food contamination/ or food industry/ or food insecurity/ or cooked food/ or food safety/ or food analysis/ or food chain/ or fast food/ or dried food/ or sea food/ or food handling/ or food security/ or food/ |
| 36 | water table/ or drinking water/ or water quality/ or tap water/ or water pollutant/ or water contamination/ or water pollution/                                                                                                                                                                        |
| 37 | sea food/                                                                                                                                                                                                                                                                                              |
| 38 | fish/                                                                                                                                                                                                                                                                                                  |
| 39 | bivalve disease/ or bivalve/                                                                                                                                                                                                                                                                           |
| 40 | Crustacea/                                                                                                                                                                                                                                                                                             |
| 41 | 35 or 36 or 37 or 38 or 39 or 40                                                                                                                                                                                                                                                                       |

|    |                       |
|----|-----------------------|
| 42 | 34 and 41             |
| 43 | nanoparticle/ or nano |
| 44 | 5 and 43              |
| 45 | 41 and 44             |
| 46 | 42 or 45              |
