# Supplementary material for: Microplastic contamination of drinking water: A systematic review
Source: PubMed Central journal article supplement (PMC7394398; doi:10.1371/journal.pone.0236838), 2020-07-31
Supplement: pone.0236838.s005.pdf [file pone.0236838.s005.pdf]

**S2 Table. Risk of bias (RoB) assessment tool template**

| Domain                                                    | No | Question                                                                       | Answer | Notes | Rating (high, low, unclear) |
|-----------------------------------------------------------|----|--------------------------------------------------------------------------------|--------|-------|-----------------------------|
| <b>Internal validity</b>                                  |    |                                                                                |        |       |                             |
| Appropriateness of study design to the research objective | 1  | Is the design appropriate for the questions of the study?                      |        |       |                             |
| <b>Sampling</b>                                           |    |                                                                                |        |       |                             |
| Sample method                                             | 2  | Has the method been used in other studies?                                     |        |       |                             |
|                                                           | 3  | Is the method validated?                                                       |        |       |                             |
|                                                           | 4  | Are there precautions in place to protect further contamination of the sample? |        |       |                             |
| Sample location                                           | 5  | Is there a rationale available?                                                |        |       |                             |
|                                                           | 6  | Is the location appropriate?                                                   |        |       |                             |
| Sample randomization                                      | 7  | Is the sampling method guarantying randomization of the sample?                |        |       |                             |
| Use of procedural blank samples                           | 8  | Are the results of the procedural blank samples reported?                      |        |       |                             |
| Use of replicate samples                                  | 9  | Is the study using replicate samples?                                          |        |       |                             |
|                                                           | 10 | How many?                                                                      |        |       |                             |
| <b>Analysis</b>                                           |    |                                                                                |        |       |                             |
| Particles extraction method                               | 11 | Is the method used by other studies?                                           |        |       |                             |
|                                                           | 12 | Is the method validated?                                                       |        |       |                             |
| Particles identification method                           | 13 | Is the method one of the four validated methods?                               |        |       |                             |
| Amount of sample analysed for composition.                | 14 | How much of the sample has been analysed?                                      |        |       |                             |
| Particle composition match to the library of choice       | 15 | Is the match > or < 60% match?                                                 |        |       |                             |
| Library of choice (type, kind)                            | 16 | Is the library made by the lab or is it a commercial library?                  |        |       |                             |

|                             |    |                                                                                   |  |                      |  |
|-----------------------------|----|-----------------------------------------------------------------------------------|--|----------------------|--|
|                             | 17 | Is one library or more being used?                                                |  |                      |  |
| Statistical analysis        | 18 | Is the statistical analysis appropriate for the sample?                           |  |                      |  |
| Interpretation              | 19 | Has the interpretation of the results been based on the outcomes of the analysis? |  |                      |  |
| <b>Quality of reporting</b> |    |                                                                                   |  |                      |  |
| Methodology                 | 20 | Have the methods used in the study been reported in detail?                       |  |                      |  |
| Limitations                 | 21 | Have the study recognized limitations?                                            |  |                      |  |
|                             |    |                                                                                   |  | <b>overall score</b> |  |
