# Supplementary material for: Microplastic contamination of drinking water: A systematic review
Source: PubMed Central journal article supplement (PMC7394398; doi:10.1371/journal.pone.0236838), 2020-07-31

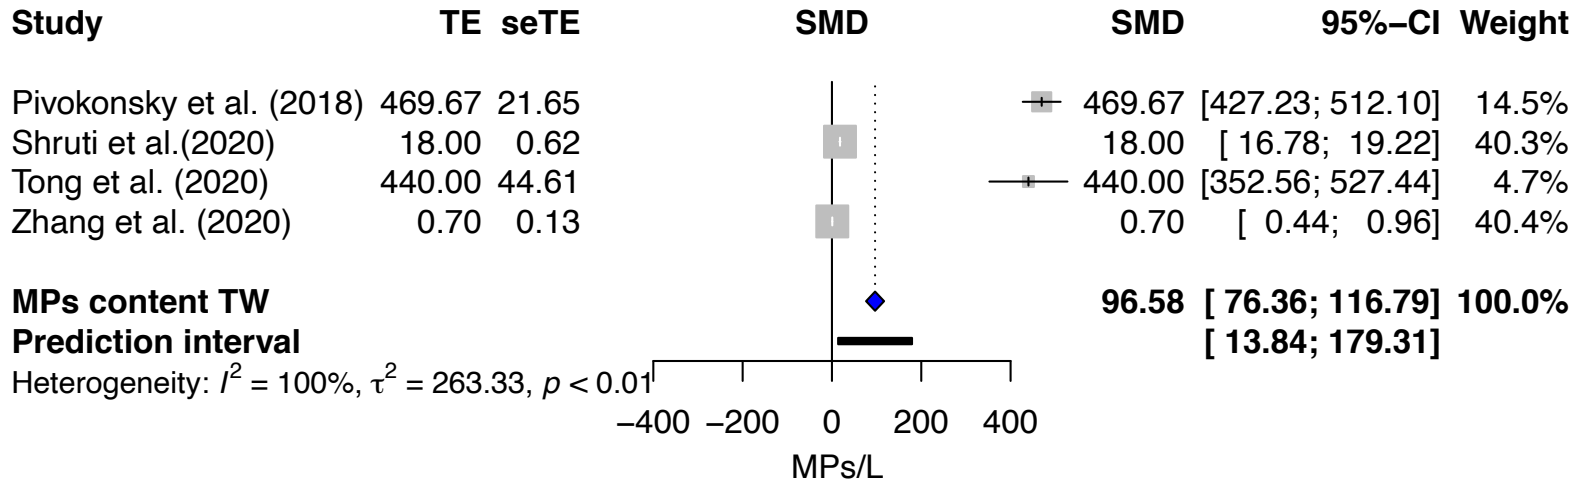

Supplement: pone.0236838.s007.pdf [file pone.0236838.s007.pdf]
