# Supplementary material for: Microplastic contamination of drinking water: A systematic review
Source: PubMed Central journal article supplement (PMC7394398; doi:10.1371/journal.pone.0236838), 2020-07-31
Supplement: pone.0236838.s009.pdf [file pone.0236838.s009.pdf]

| Study | TE | seTE | SMD | SMD | 95%-CI | Weight |
|-------|----|------|-----|-----|--------|--------|
|-------|----|------|-----|-----|--------|--------|

|                            |         |         |  |         |                    |       |
|----------------------------|---------|---------|--|---------|--------------------|-------|
| Oßmann et al. (2018)       | 4889.00 | 1568.08 |  | 4889.00 | [1815.61; 7962.39] | 0.0%  |
| Oßmann et al. (2018)       | 2649.00 | 903.46  |  | 2649.00 | [ 878.25; 4419.75] | 0.1%  |
| Oßmann et al. (2018)       | 3074.00 | 843.67  |  | 3074.00 | [1420.44; 4727.56] | 0.1%  |
| Schymanski et al. (2018)   | 118.00  | 25.40   |  | 118.00  | [ 68.21; 167.79]   | 14.3% |
| Schymanski et al. (2018)   | 14.00   | 4.43    |  | 14.00   | [ 5.32; 22.68]     | 17.4% |
| Schymanski et al. (2018)   | 11.00   | 4.62    |  | 11.00   | [ 1.95; 20.05]     | 17.4% |
| Schymanski et al. (2018)   | 50.00   | 17.33   |  | 50.00   | [ 16.03; 83.97]    | 15.9% |
| Kankanige and Babel (2020) | 140.00  | 2.36    |  | 140.00  | [ 135.38; 144.62]  | 17.4% |
| Kankanige and Babel (2020) | 52.00   | 0.73    |  | 52.00   | [ 50.57; 53.43]    | 17.5% |

**BW without high Rob study**

**Prediction interval**

Heterogeneity:  $I^2 = 99\%$ ,  $\tau^2 = 2950.03$ ,  $p < 0.01$

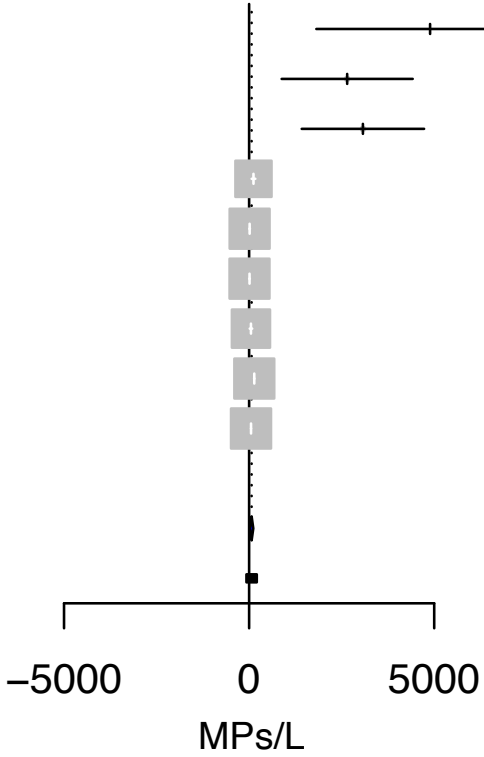

**67.62 [ 23.11; 112.12] 100.0%**

**[ -71.59; 206.82]**
