# Supplementary material for: Microplastic contamination of drinking water: A systematic review
Source: PubMed Central journal article supplement (PMC7394398; doi:10.1371/journal.pone.0236838), 2020-07-31

**Standardised Mean Difference**

**SMD**

**95%–CI**

**Subgroup**

**cartons**

*Schymanski et al. (2018)*

**Random effects model**

not applicable

11.00

[ 1.95; 20.05]

**11.00**

**[ 1.95; 20.05]**

**glass bottles**

*OBmann et al. (2018)*

*Schymanski et al. (2018)*

*Kankanige and Babel (2020)*

**Random effects model**

$I^2 = 84%$  [ 54%; 95%],  $\chi^2_2 = 12.84$  ( $p < 0.01$ )

3074.00

[ 1420.44; 4727.56]

50.00

[ 16.03; 83.97]

52.00

[ 50.57; 53.43]

**54.83**

**[ -3.43; 113.08]**

**plastic reusable**

*OBmann et al. (2018)*

*Schymanski et al. (2018)*

**Random effects model**

$I^2 = 89%$ ,  $\chi^2_1 = 9.25$  ( $p < 0.01$ )

4889.00

[ 1815.61; 7962.39]

118.00

[ 68.21; 167.79]

**2245.88**

**[-2402.27; 6894.03]**

**plastic single use**

*OBmann et al. (2018)*

*Schymanski et al. (2018)*

*Kankanige and Babel (2020)*

**Random effects model**

$I^2 = 100%$  [100%; 100%],  $\chi^2_2 = 639.04$  ( $p < 0.01$ )

2649.00

[ 878.25; 4419.75]

14.00

[ 5.32; 22.68]

140.00

[ 135.38; 144.62]

**89.51**

**[ -34.33; 213.36]**

**Fixed effects (plural) model**

**12.44**

**[ 3.52; 21.37]**

**Prediction interval**

$I^2 = 99%$  [99%; 100%],  $\chi^2_3 = 4.51$  ( $p = 0.21$ )

**[ -71.59; 206.82]**

-5000 0 5000

MPs/L

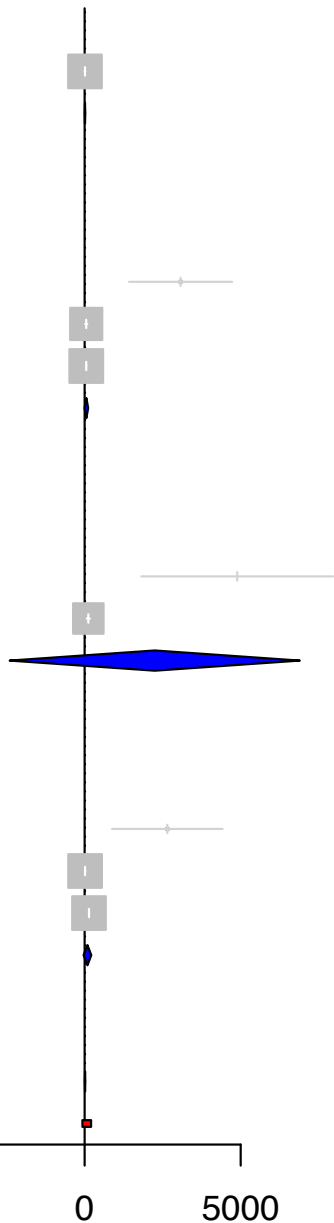

Supplement: pone.0236838.s010.pdf [file pone.0236838.s010.pdf]
